# Supplementary material for: Targeting DDR2 enhances tumor response to anti–PD-1 immunotherapy
Source: PubMed Central journal article supplement — Sci Adv. 2019 Feb 20;5(2):eaav2437. doi: 10.1126/sciadv.aav2437 (PMC6382401; doi:10.1126/sciadv.aav2437), 2019-02-20
Supplement: aav2437_SM.pdf [file aav2437_SM.pdf]

## Supplementary Materials for

### Targeting DDR2 enhances tumor response to anti-PD-1 immunotherapy

Megan M. Tu, Francis Y. F. Lee, Robert T. Jones, Abigail K. Kimball, Elizabeth Saravia, Robert F. Graziano, Brianne Coleman, Krista Menard, Jun Yan, Erin Michaud, Han Chang, Hany A. Abdel-Hafiz, Andrii I. Rozhok, Jason E. Duex, Neeraj Agarwal, Ana Chauca-Diaz, Linda K. Johnson, Terry L. Ng, John C. Cambier, Eric T. Clambey, James C. Costello, Alan J. Korman, Dan Theodorescu\*

\*Corresponding author. Email: [dan.theodorescu@cshs.org](mailto:dan.theodorescu@cshs.org)

Published 20 February 2019, *Sci. Adv.* **5**, eaav2437 (2019)  
DOI: 10.1126/sciadv.aav2437

#### The PDF file includes:

Fig. S1. shRNA-mediated knockdown of DDR2 expression.

Fig. S2. Histological comparison of lungs from B16F10 tumor-bearing mice.

Fig. S3. Spleen from NA13 tumor-bearing mice analyzed using CyTOF with PhenoGraph algorithm.

Fig. S4. Analysis of PD-1 expression on tumor-infiltrating T cells.

Fig. S5. Spleen from MC38 tumor-bearing mice analyzed using CyTOF with PhenoGraph algorithm.

Fig. S6. Quantification of immune cell populations in bladder cancer patients with varying DDR2 expression levels.

Table S4. CyTOF antibody panel used for the analysis of spleen and tumors from mice implanted with the NA13 cell line.

Table S5. CyTOF antibody panel used for the analysis of tumors from mice implanted with the MC38 cell line.

#### Other Supplementary Material for this manuscript includes the following:

(available at [advances.sciencemag.org/cgi/content/full/5/2/eaav2437/DC1](https://advances.sciencemag.org/cgi/content/full/5/2/eaav2437/DC1))

Table S1 (Microsoft Excel format). NA13 mutation analysis.

Table S2 (Microsoft Excel format). Gene set enrichment analysis.

Table S3 (Microsoft Excel format). Thirty-four-gene shRNA library.

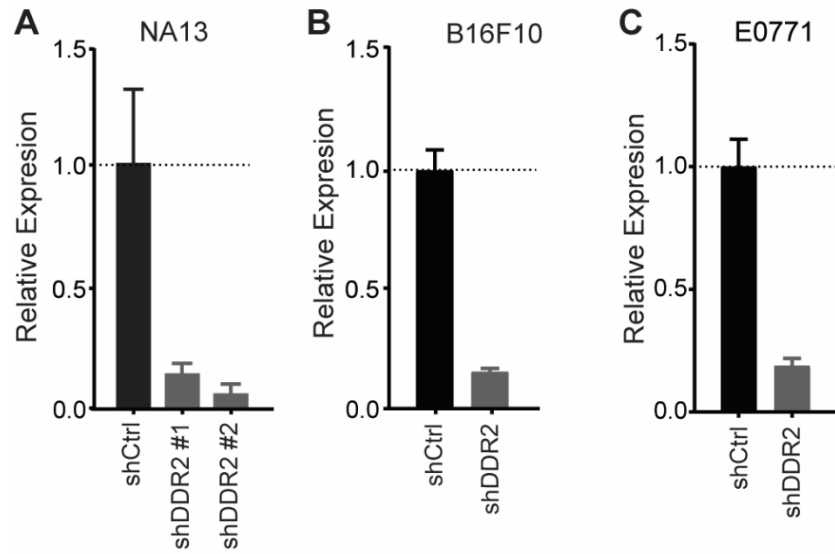

**Fig. S1. shRNA-mediated knockdown of DDR2 expression.** qPCR analysis of (A), NA13 shControl (shCtrl), and shDDR2 #1 and #2. (B), B16F10 shCtrl and shDDR2. (C), E0771 shCtrl and shDDR2. 18s was used as an internal control for normalization of mRNA levels across different samples.

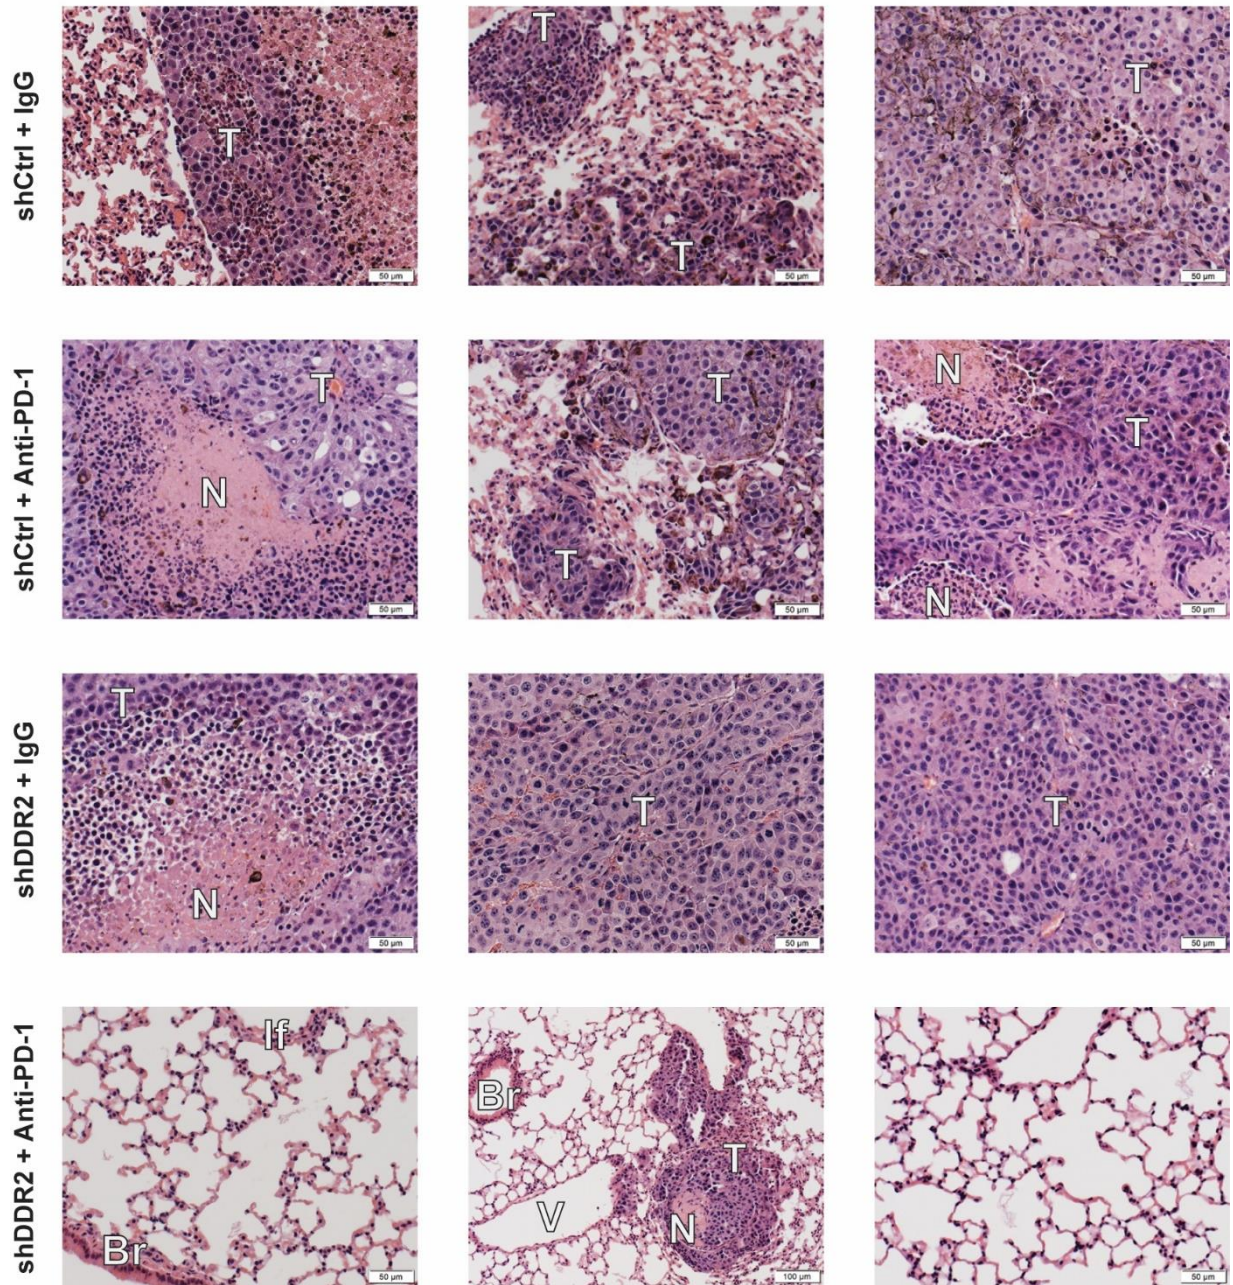

**Fig. S2. Histological comparison of lungs from B16F10 tumor-bearing mice. (A),** Representative H&E images from the lungs of mice injected intravenously with B16F10 to form pulmonary metastases. T, tumor; N, necrosis; If, inflammation; Br, bronchiole; V, vein.

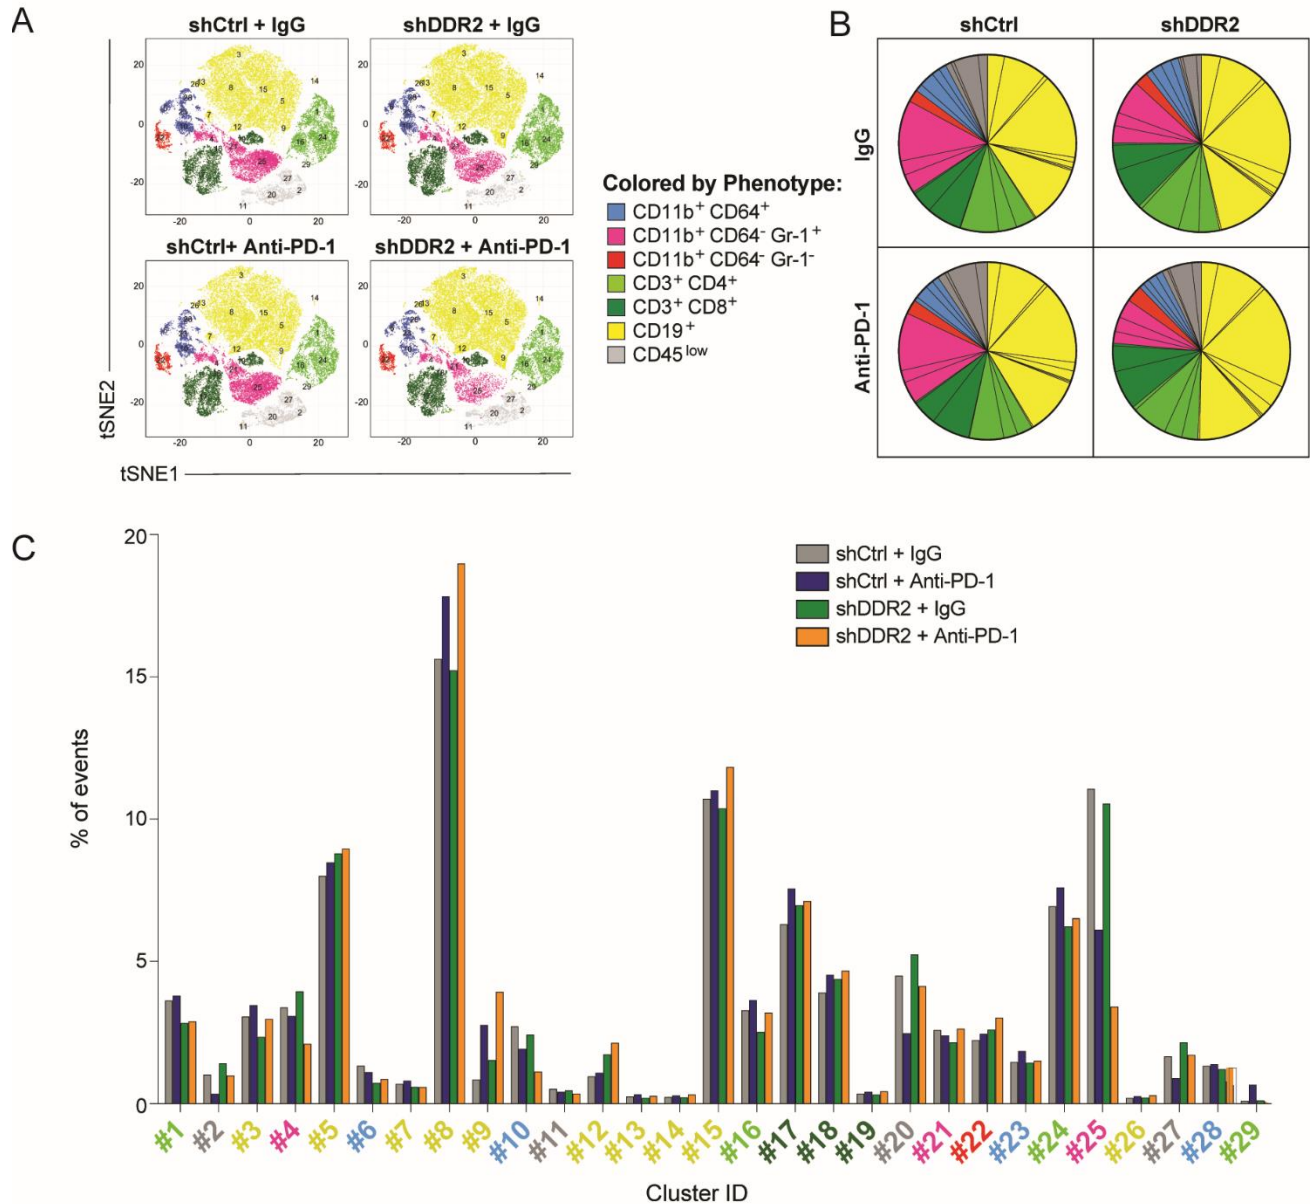

**Fig. S3. Spleen from NA13 tumor-bearing mice analyzed using CyTOF with PhenoGraph algorithm.** (A), PhenoGraph-defined cellular distribution and clustering, as defined by tSNE1 and tSNE2, colored by phenotype designation for each experimental condition (data pooled from  $n = 5-6$  mice per group). Data shows all normalized viable single cells, subjected to the PhenoGraph algorithm. (B), Pie charts show the cellular distribution of 29 PhenoGraph defined clusters colored according to phenotypic designation. c, Frequency of events across 29 PhenoGraph defined clusters for each experimental condition. Each colored number represents the phenotype which these clusters fall into.

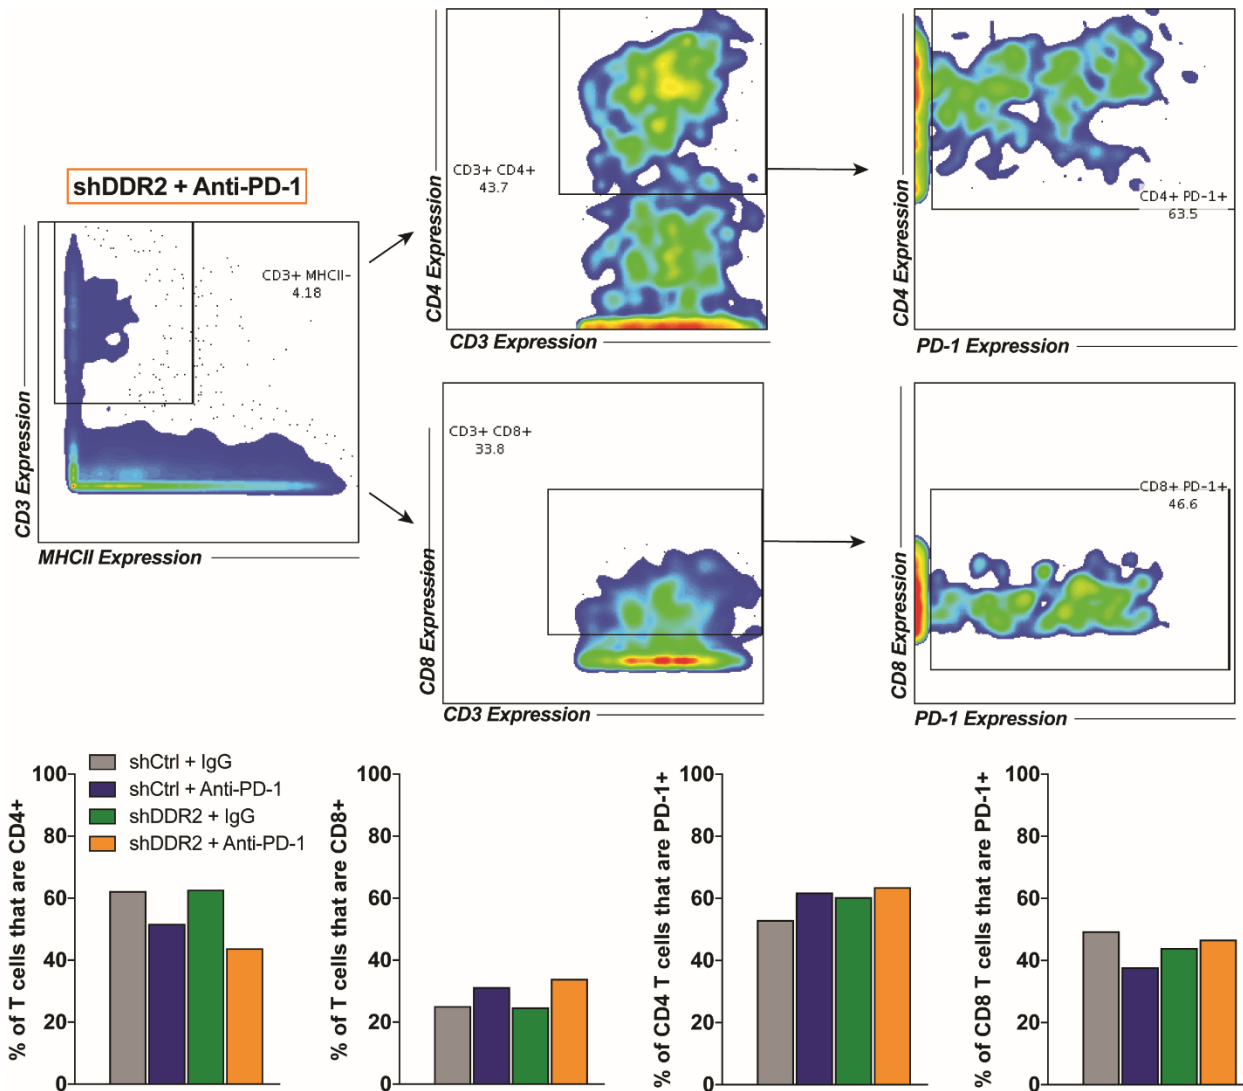

**Fig. S4. Analysis of PD-1 expression on tumor-infiltrating T cells.** Files that were previously gated for  $191^+$   $193^+$   $195^-$  events and concatenated according to group and used for the PhenoGraph analysis found in Fig. 3B are shown. Files were further gated for T cells (defined as:  $CD3^+$   $MHC-II^-$  events), CD4 T cells ( $CD3^+$   $CD4^+$   $MHC-II^-$  events), CD8 T cells ( $CD3^+$   $CD8^+$   $MHC-II^-$  events), PD-1<sup>+</sup> CD4 T cells ( $CD3^+$   $CD4^+$   $MHC-II^-$  PD-1<sup>+</sup> events), and PD-1<sup>+</sup> CD8 T cells ( $CD3^+$   $CD8^+$   $MHC-II^-$  PD-1<sup>+</sup> events).

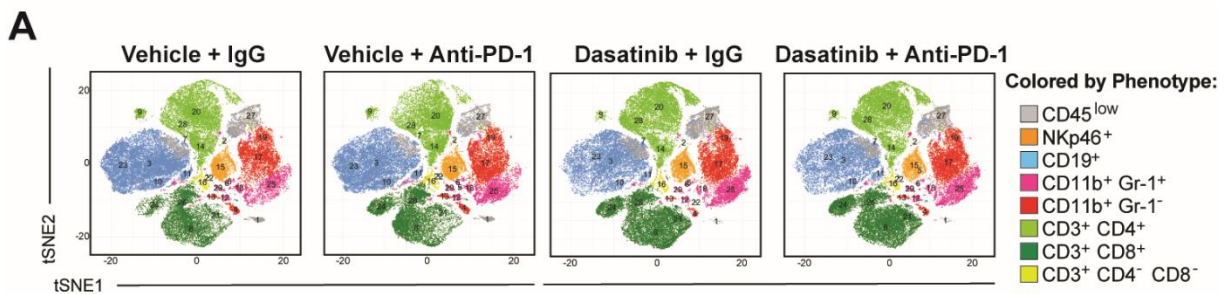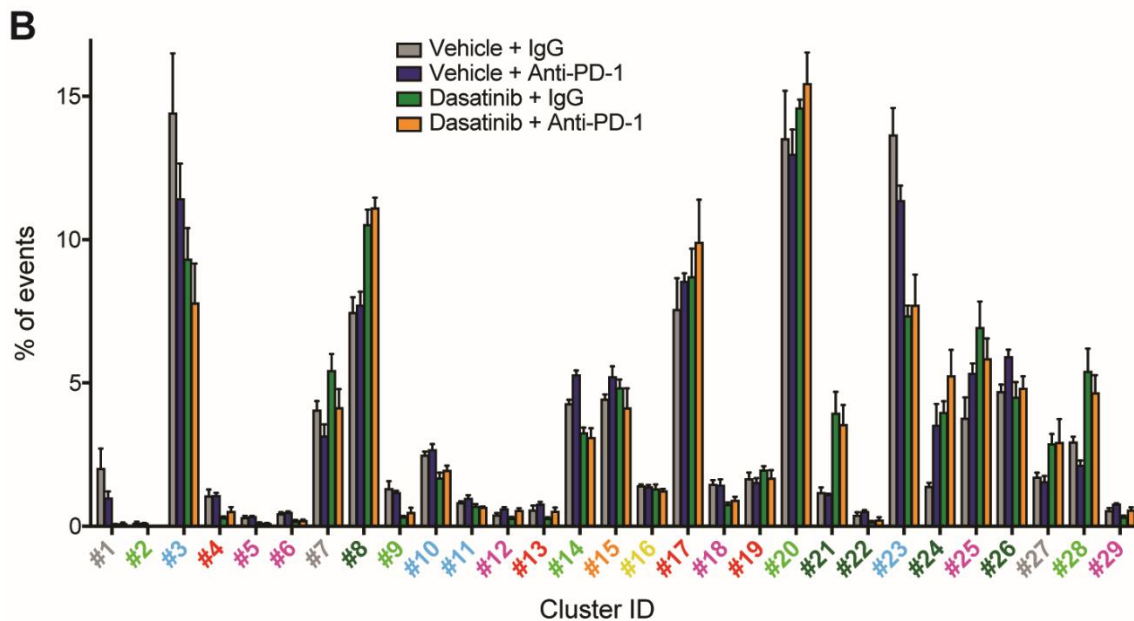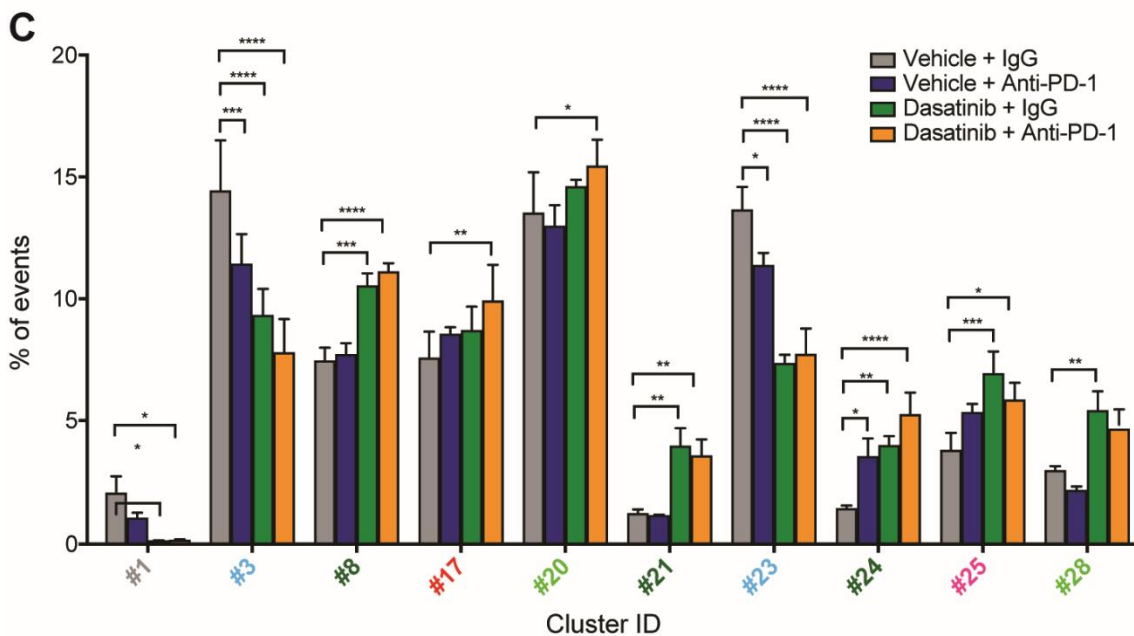

**Fig. S5. Spleen from MC38 tumor-bearing mice analyzed using CyTOF with PhenoGraph algorithm.** (A), PhenoGraph-defined cellular distribution and clustering, as defined by tSNE1 and tSNE2, colored by cellular phenotype for all treatment conditions ( $n = 4$  mice per group). Data shows all normalized viable single cells, subjected to the PhenoGraph algorithm. (B), Frequency of all 29 PhenoGraph identified clusters, colored according to experimental group and cluster's primary phenotype designation. (C), The frequency of all statistically significant PhenoGraph identified clusters compared to Vehicle + IgG organized according to cluster phenotypic designation. \* $P < 0.05$ , \*\* $P < 0.01$ , \*\*\* $P < 0.001$ , \*\*\*\* $P < 0.0001$ .

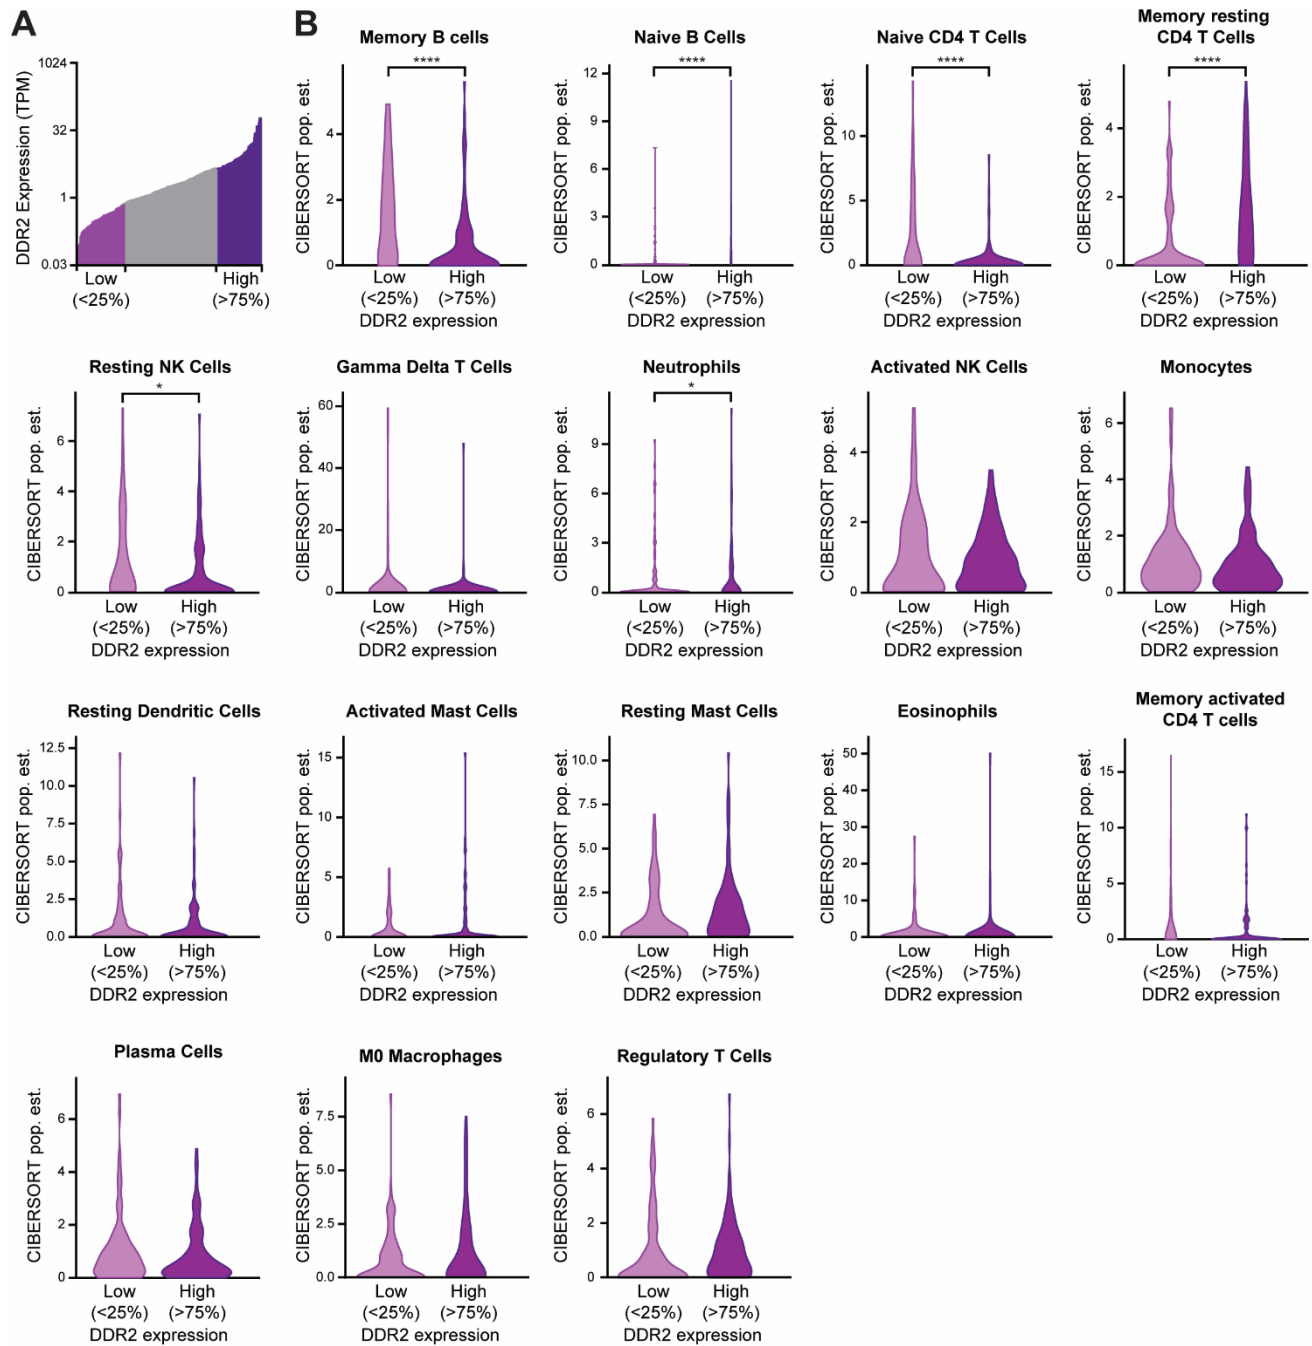

**Fig. S6. Quantification of immune cell populations in bladder cancer patients with varying DDR2 expression levels. (A),** Distribution of DDR2 expression in quartiles. **(B),** Relative abundance of tumor-infiltrating immune cell populations determined by CIBERSORT methodology (24) in bladder cancer patients from RNAseq data in the TCGA (n = 433). \* $P < 0.05$ , \*\* $P < 0.01$ , \*\*\* $P < 0.001$ , \*\*\*\* $P < 0.0001$ .



**Table S4. CyTOF antibody panel used for the analysis of spleen and tumors from mice implanted with the NA13 cell line.**

| <b>Target</b>    | <b>Clone</b> | <b>Tag</b> | <b>Source</b> |
|------------------|--------------|------------|---------------|
| CD45             | 30-F11       | 89Y        | Fluidigm      |
| Ly-6G/C (Gr-1)   | RB6-8C5      | 141Pr      | Fluidigm      |
| CD11c            | N418         | 142Nd      | Fluidigm      |
| CD357 (GITR)     | DTA1         | 143Nd      | Fluidigm      |
| MHC-I            | 28-14-8      | 144Nd      | Fluidigm      |
| CD69             | H1.2F3       | 145Nd      | Fluidigm      |
| CD8 $\alpha$     | 53-6.7       | 146Nd      | Fluidigm      |
| CD11b            | M1/70        | 148Nd      | Fluidigm      |
| CD19             | 6D5          | 149Sm      | Fluidigm      |
| CD25             | 3C7          | 150Nd      | Fluidigm      |
| CD64             | X54-5/7.1    | 151Eu      | Fluidigm      |
| CD3 $\epsilon$   | 145-2C11     | 152Sm      | Fluidigm      |
| CD274 (PD-L1)    | 10f.9G2      | 153Eu      | Fluidigm      |
| CD152 (CTLA-4)   | UC10-4B9     | 154Sm      | Fluidigm      |
| IRF4             | 3E4          | 155Gd      | Fluidigm      |
| Foxp3            | FJK-16s      | 158Gd      | Fluidigm      |
| CD279 (PD-1)     | RMP1-30      | 159Tb      | Fluidigm      |
| Tbet             | 4B10         | 161Dy      | Fluidigm      |
| CD366 (Tim-3)    | RMT3-23      | 162Dy      | Fluidigm      |
| Arginase-1       | polyclonal   | 166Er      | Fluidigm      |
| NKp46            | 29A1.4       | 167Er      | Fluidigm      |
| Ki-67            | B56          | 168Er      | Fluidigm      |
| CD49b            | HMa2         | 170Er      | Fluidigm      |
| CD44             | IM7          | 171Yb      | Fluidigm      |
| CD4              | RM4-5        | 172Yb      | Fluidigm      |
| CD223/LAG3       | C9B7W        | 174Yb      | Fluidigm      |
| CD127            | A7R34        | 175Lu      | Fluidigm      |
| CD278/ICOS       | 7E.17G9      | 176Yb      | Fluidigm      |
| Live/Dead        | N/A          | 195Pt      | Fluidigm      |
| MHC-II (I-A/I-E) | M5/114.15.2  | 209Bi      | Fluidigm      |

**Table S5. CyTOF antibody panel used for the analysis of tumors from mice implanted with the MC38 cell line.**

| <b>Target</b> | <b>Clone</b> | <b>Tag</b>        | <b>Source</b> |
|---------------|--------------|-------------------|---------------|
| Ly6G/C (Gr-1) | RB6-8C5      | 141Pr             | Fluidigm      |
| CD11c         | N418         | 142 <sup>Nd</sup> | Fluidigm      |
| CD69          | H1.2F3       | 145Nd             | Fluidigm      |
| CD45          | 30-F11       | 147Sm             | Fluidigm      |
| CD11b (MAC1)  | M1/70        | 148Nd             | Fluidigm      |
| CD19          | 6D5          | 149Sm             | Fluidigm      |
| CD25          | 3C7          | 151Eu             | Fluidigm      |
| CD3e          | 145-2C11     | 152Sm             | Fluidigm      |
| TER-119       | TER119       | 154Sm             | Fluidigm      |
| CD62L         | MEL-14       | 160Gd             | Fluidigm      |
| CD8a          | 53-6.7       | 168Er             | Fluidigm      |
| TCR $\beta$   | H57-597      | 169Tm             | Fluidigm      |
| NK1.1         | PK136        | 170Er             | Fluidigm      |
| CD44          | IM7          | 171Yb             | Fluidigm      |
| CD4           | RM4-5        | 172Yb             | Fluidigm      |
| B220          | RA3-6B2      | 176Yb             | Fluidigm      |
| NKp46 (CD334) | 29A1.4       | 167Er             | Fluidigm      |

Ir-intercalator (1:1,000 dilution)

Rh103 (1:2,000 dilution)
